# Supplementary material for: Evolutionary conservation of nested MIR159 structural microRNA genes and their promoter characterization in Arabidopsis thaliana
Source: Front Plant Sci. 2022 Jul 26;13:948751. doi: 10.3389/fpls.2022.948751 (PMC9361848; doi:10.3389/fpls.2022.948751)
Supplement: Supplementary file 1 [file Table_1.XLSX]

## Sheet: S_1
Table S1. List of primers used in this study
Primer name	sequence(5'-3')
2x35S:ath-MIR159a-F	GTAGAGCTCCTTAAAGTTCAAAC
3kbF	AAGCATCCTCACTAACCGTTGGG
3kbR	TACATCCCAGTTTAGCAACGAAGG
2.5kbF	CAAGTTTCAGCTGTCCATTGGGTC
2.1kbF	CTCCATTCTACAAATTGCCACAAC
1.5kbF	AAGCGTCTATCGTAACGACGTCG
1.0kbF	GCCTAACATTTGAGTATGAACCAG
0.7kbF	CTAGTTGTTAGGGCTAACAAATG
0.2kbF	GCTCTAATGTAAGAGATTTACCTC
Δ858_F	TTACACGATAAAAAACACACTTAAAAATAAGCC
Δ858_R	AGTGTGTTTTTTATCGTGTAAGTTTTTTTTTGA
Δ946_F	TTTACTTCAGGGTCAAGTATTTTGCTA
Δ946_R	TGACCCTGAAGTAAATTTTTCTGGTTCA
ath-U6-F	GGGGACATCCGATAAAATTGG
ath-U6-R	GGACCATTTCTCGATTTGTGC
miR159a.1-3_F	GGTTTGGATTGAAGGGAGCTCTA
miR159a.2-5_F	AGCTGCTAAGCTATGGATCCC
miR159a.3_F	GGCGTAAAAAAGGATTTGGTTATA
miR159a.2-3_F	GGATTGCATATCTCAGGAGCTTT
miR159a.1-5_F	GAGCTCCTTAAAGTTCAAACA
MYB33-F	TCGTCATCTCCTCCACACTCTG
MYB33-R	CCTCGGATTTAGTTTGGGATAC
MYB65-F	GATGATGGTTCCTGATAGCC
MYB65-R	AGGCATCAACAGAGTCAAGG
CP1-F	ACGCTCGATAAACATTTGGG
CP1-R	CAAGCAAACAATCTTTCTTTGAA
Cyclophilin-F	TGGACCAGGTGTACTTTCAATGG
Cyclophilin-R	CCACTGTCTGCAATTACGACTTTG

## Sheet: S_2
Table S2. MIR159 structure in different plant organisms.
MIRNA	conserved_miRNA.1-5	specific_miRNA.2-5	conserved_miRNA.3-5	specific_miRNA.4-5	conserved_miRNA.3-3	specific_miRNA.2-3	conserved_miRNA.1-3	Methods	Structure
ahy-MIR159	GAGCUCCUUGAAGUCCAACAG	.	AGCUGCUAAGCUAUGGAUCCC	.	AUUCCAUAUCCUGGGAGCUUC	.	UUUGGAUUGAAGGGAGCUCUA	blastn	Nested
aly-MIR159a	GAGCUCCUUGAAGUUCAAACG	.	AGCUGCUAAGCUAUGGAUCCC	AAAAAAGGAUUUGGUUAUAUGG	UUGCAUAUCUCAGGAGCUUU	.	UUUGGAUUGAAGGGAGCUCUA	blastn	Nested
aly-MIR159b	GAGCUCCUUGAAGUUCAAUGG	.	AGCUGCUAAGCUAUGGAUCCC	.	AUUCCAUAUCUCAGGAGCUUU	.	UUUGGAUUGAAGGGAGCUCUU	blastn	Nested
aly-MIR159c	GAGCUCCCUUCCUCCAAAACG	.	.	.	.	.	UUUGGAUUGAAGGGAGCUCCU	.	Non-nested
aqc-MIR159	GAGUCUUUCCAGCCCAAAAC	.	.	.	.	.	UUUGGACUGAAGGGAGCUCUA	.	Non-nested
ath-MIR159a	GAGCUCCUUAAAGUUCAAACA	.	AGCUGCUAAGCUAUGGAUCCC	UAAAAAAGGAUUUGGUUAUAUGG	AUUGCAUAUCUCAGGAGCUUU	.	UUUGGAUUGAAGGGAGCUCUA	blastn	Nested
ath-MIR159b	GAGCUCCUUGAAGUUCAAUGG	.	AGCUGCUAAGCUAUGGAUCCC	.	AUGCCAUAUCUCAGGAGCUUU	.	UUUGGAUUGAAGGGAGCUCUU	blastn	Nested
ath-MIR159c	GAGCUCCCUUCCUCCAAAACG	.	.	.	.	.	UUUGGAUUGAAGGGAGCUCCU	.	Non-nested
atr-MIR159	GAGCUCCUUGAGGUCCAAUCC	.	AGCUGCUAGUUCAUGGAUCCC	.	UUUGCAUGACCAAGGAGCUGC	.	UUUGGAUUGAAGGGAGCUCUA	blastn	Nested
bdi-MIR159a	AGCUCCCUUCGAUCCAAUC	.	AGCUGCCGGUUCAUGGAUACC	.	UUUGCAUGACCCGGGAGAUG	.	CUUGGAUUGAAGGGAGCUCU	MEME	Nested
bdi-MIR159b	GAGCUCCUAUCAUUCCAAUGA	AAGGUCUGUCAGAAGGGUGAUAC	AGCUGCUUGUUCAUGGUUCCC	.	UUUGCAUGACCGAGGAGCCGC	AUCCACCCCUUGCCGACCGCUG	UUUGGAUUGAAGGGAGCUCUG	blastn	Nested
bna-MIR159	GGGCUCCUUAUAGUUCAAACG	.	AGCUGCUAAGCUAUGAAUCCC	AAAAAGGAUUUGGUUAUAUGG	CUUACAUAUCUCAGGAGCUUU	.	UUUGGAUUGAAGGGAGCUCUA	blastn	Nested
bra-MIR159a	GGGCUCCUUAUAGUUCAAACG	.	AGCUGCUAAGCUAUGAAUCCC	AAAAAGGAUUUGGUUAUAUGG	CUUACAUAUCUCAGGAGCUUU	.	UUUGGAUUGAAGGGAGCUCUA	blastn	Nested
cme-MIR159a	GAGCUCCUUGAAGUCCAAUAG	.	AGCUGCUAAGCUAUGGAUCCC	.	CUUGCAUAUCUCAGGAGCUUC	.	UUUGGAUUGAAGGGAGCUCUA	blastn	Nested
cme-MIR159b	GAGCUCCCUUUGAUUCAAAGA	.	UGCUGCGAGUUCAUGAAUACC	.	UUUGCAUGCGCUCGGAGCUG	.	AUUGGAUUGAAGGGAGCUCCU	MEME	Nested
cpa-MIR159a	GAGCUCCUUGAAGUCCAAUAG	.	AGCUGCCGAGCUAUGGAUUCC	.	UUUGCAUAUCUCAGGAGCUGC	.	UUUGGAUUGAAGGGAGCUCUA	blastn	Nested
cpa-MIR159b	AGCUCCCUUUGAUCCAAUACU	.	AUCUGAUGGCUCAUGGAUACC	.	UUUGCAUGAUUCGAGAGAUG	.	CUUGGAUUGAAGGGAGCUCC	MEME	Nested
csi-MIR159	GAGCUCCUUGAAGUCCAAAAG	.	AGCUGCUGAGCUAUGGAUCCC	.	CUUGCAUAUUUCUGGACCUUC	.	UUUGGAUUGAAGGGAGCUCUA	blastn	Nested
far-MIR159	GAGCUCCUAUCAUUCCAAUGA	.	AGCUGCUCGUUCAUGGUUCCC	.	CUAGCAUGACCGAGGAGCCGC	.	UUUGGAUUGAAGGGAGCUCUG	blastn	Nested
gma-MIR156aa	CUCUCUGCACUCCAGUGU	.	AGCUGCUAAUUCAUGGUUACC	.	UUUACAUGAAUAUGGAGACGG	.	AUUGGAGUGAAGGGAGCU	blastn	Nested
gma-MIR156z	CUCUCAGCACUCCAGUGU	.	AGCUGCUAAUUCAUGGUUACC	.	UCUGCAUGAACUUGGAGAUGG	.	AUUGGAGUGAAGGGAGCU	blastn	Nested
gma-MIR159a	GAGCUCCUUGAAGUCCAAUUG	.	AGCUGCUUAGCUAUGGAUCCC	.	CUUCCAUAUUUGGGGAGCUUC	.	UUUGGAUUGAAGGGAGCUCUA	blastn	Nested
gma-MIR159b	GAGUUCCCUGCACUCCAAGUC	.	UACUGCUAGUUCAUGGAUACC	.	UUUGCAUGCCCUGGGAGAUG	.	AUUGGAGUGAAGGGAGCUCCA	MEME	Nested
gma-MIR159c	GAGCUCUCUACACUCCAAGUC	.	UGCUGCUAAUUCAUGGUUACC	.	UCUGCAUGAAUUUGAAGACG	.	AUUGGAGUGAAGGGAGCUCCG	MEME	Nested
gma-MIR159d	GAGCUCCUUGAAGUCCAAUU	.	AGCUGCUUAGCUAUGGAUCCC	.	CUUCCAUAUCUGGGGAGCUU	.	UUUGGAUUGAAGGGAGCUCUA	MEME	Nested
gma-MIR159e	GAGCUCCUUGAAGUCCAAUU	.	GCUGCUUAGCUAUGGAUCCCA	.	CUUCCAUAUCUGGGGAGCUUC	.	UUUGGAUUGAAGGGAGCUCUA	blastn	Nested
gma-MIR159f	GAGUUCCCUGCACUCCAAGUC	.	UGCUGCUAGUUCAUGGAUACC	.	UUUGCAUGACCUGGGAGAUG	.	AUUGGAGUGAAGGGAGCUCCA	MEME	Nested
hbr-MIR159a	GAGCUCCUUGAAGUCCAAUAG	.	AGCUGCUGAGCUAUGGAUCCC	.	CUUGCAUAUCUCAGGAGCUUC	.	UUUGGAUUGAAGGGAGCUCUA	blastn	Nested
hbr-MIR159b	GAGCUCCUUGAAGUCCAAUAG	.	GAGCUGCUGAGCUAUGGAUCC	.	UUGCAUAUCUCAGGAGCUUCA	.	UUUGGAUUGAAGGGAGCUCUA	MEME	Nested
htu-MIR159a	GAGCUCCUUAAAGUCCAAUAG	.	AGCUGCUAGUUUAUGGAUCCC	.	CUUGCAUACACUUGGAGCUUU	.	UUUGGAUUGAAGGGAGCUCUA	blastn	Nested
hvu-MIR159a	GAGCUCCUAUCAUUCCAAUGA	.	AGCUGCUUGUUCAUGGUUCCC	.	UUUGCAUGAUCGAGGAGCCGC	.	UUUGGAUUGAAGGGAGCUCUG	blastn	Nested
hvu-MIR159b	UUUGGAUUGAAGGGAGCUCUG	.	.	.	.	.	GGGCCCUCUUAGAUCUAGCCA	.	Non-nested
lus-MIR159a	GAGCUCUCUUCACUCCAUUUC	.	.	.	.	.	AUUGGAGUGAAGGGAGCUCGA	.	Non-nested
lus-MIR159b	GAGCUCCUUUGGGUCCAAACA	.	AGCUGCUGAGCUAUGGAUUCC	.	CUCGUUUUGCAUAUCUCAGGAGCCUC	.	UUUGGAUUGAAGGGAGCUCUC	blastn	Nested
lus-MIR159c	GAGCUCCUUUGGGUCCAAACA	.	AGCUGCUGAGCUAUGGAUUCC	.	CUCGUUUUGCAUAUCUCAGGAGCCUC	.	UUUGGAUUGAAGGGAGCUCUU	blastn	Nested
mdm-MIR159a	AGCUCCUUUUGAUUCAAAAGC	CAGGAGGGAGAGAGGGUUUUACAC	UGCUGCUGGUUCAUGGAUGCC	.	UUUGCAUGGCCCAGGAGAUGU	GAAUUCCUUCUCCUCUCCUUU	CUUGGAUUGAAGGGAGCUCC	blastn	Nested
mdm-MIR159b	AGCUCCCUUUGAUUCAAAAGC	CAGGAGGGAGAGAGGGUCUUACAC	UGCUGCUGGUUCAUGGAUACC	.	UUUGCAUGACCCAGGAGAUGU	GAAUUCCUUCUCCUCUCCUUU	CUUGGAUUGAAGGGAGCUCC	blastn	Nested
mdm-MIR159c	AGCUCCUUUUGAUUCAAAAG	CAGGAGGGAGAGAGGGUUUUACAC	UGCUGCUGGUUCAUGGAUGCC	.	UUUGCAUGGCCCAGGAGAUGU	GAAUUCCUUCUCCUCUCCUUU	CUUGGAUUGAAGGGAGCUCC	blastn	Nested
mes-MIR159a	GAGCUCCUUGAAGUCCAAUAG	.	AGCUGCUGAGCUAUGGAUCCC	.	CUUGCAUAUCUCAGGAGCUUC	.	UUUGGAUUGAAGGGAGCUCUA	blastn	Nested
mes-MIR159b	GAGCUCCUUAAAGUCCAAUAG	.	AGCUGCUGAGCUAUGGAUACC	.	CUUGCAUAUCUCUGGAGCUUC	.	UUUGGAUUGAAGGGAGCUCUA	blastn	Nested
mes-MIR159c	GAGCUCUCUUCCCUCCUACUG	.	GGCUGCCAGUUCAUGAAUACC	.	UUUGCAUGACCUGGGAGACG	.	AUUGGAGUGAAGGGAGCUCUG	MEME	Nested
mes-MIR159d	GAGAUCUCUUCACUCCUAUGU	.	GGCUGCUAGUUCAUGAAUACC	.	UUUGCAUGACCUGGGAGACG	.	AUUGGAGUGAAGGGAGCUCUG	MEME	Nested
mtr-MIR159a	GAGCUUCCUUUAGUCCAAAUA	.	AGCUGCUUAGCUAUGGGUCCC	.	CUUCCAUAUCUAGGGAGCCUU	.	UUUGGAUUGAAGGGAGCUCUA	blastn	Nested
mtr-MIR159b	GGGCUCUCCGCACUCCAAGUC	.	UGCUGCUUGUUCAUGGUUACC	.	UUUGCAUGAAUUUGGAGAUAG	.	AUUGGAGUGAAGGGAGCUCCA	blastn	Nested
nta-MIR159	GAGCUCCUUGAAGUCCAACAG	.	AGCUGCUGACCUAUGGAUUCC	.	GUUGCAUAUGUCAGGAGCUUC	.	UUUGGAUUGAAGGGAGCUCUA	blastn	Nested
osa-MIR159a	GAGCUCCUUUCGGUCCAAAAAGG	.	AGCUGCUGGGUCAUGGAUCCC	.	CUUGCAUGCCCCAGGAGCUGC	.	UUUGGAUUGAAGGGAGCUCUG	blastn	Nested
osa-MIR159b	GAGCUCCUUUCGUUCCAAUGA	.	AGCUGCUUGUUCAUGGUUCCC	.	UUUGCAUGACCAAGGAGCCGA	.	UUUGGAUUGAAGGGAGCUCUG	blastn	Nested
osa-MIR159c	GAGCUCCUUUCGAUCCAAUUC	.	AGCUGCCGAUUCAUGGAUACC	.	UUUGCAUGACCCGGGAGAUG	.	AUUGGAUUGAAGGGAGCUCCA	MEME	Nested
osa-MIR159d	GAGCUCCUUUCGAUCCAAUUC	.	AGCUGCCGGUUCAUGGAUACC	.	UUUGCAUGACCUGGGAGAUG	.	AUUGGAUUGAAGGGAGCUCCG	MEME	Nested
osa-MIR159e	GAGCUCCCUUUCGAUCCAAUUC	.	AGCUGCCGGUUCAUGGAUACC	.	UUUGCAUGACUCGGGAGAUG	.	AUUGGAUUGAAGGGAGCUCCU	MEME	Nested
osa-MIR159f	GAGCUCCCUUCGAUCCAAUCC	.	AGCUGCCGGUUCAUGGAUACC	.	UUUGCAUGACCCGGGAGAUG	.	CUUGGAUUGAAGGGAGCUCUA	MEME	Nested
pde-MIR159	GAGCUCCUUUUGUACCAAUCA	.	GACUGCCGAUUUAUGCAUCCU	.	UGUGCAUAAGGCGGGAGUUG	.	UUUGGUUUGAAGGGAGCUCUA	MEME	Nested
ppe-MIR159	GAGCUCCUUGAAGUCCAAUA	.	AGCUGCUGAGCUAUGGAUCCC	.	CUUGCAUAUCUCAGGAGCUGC	.	UUUGGAUUGAAGGGAGCUCUA	blastn	Nested
pta-MIR159a	GAGCUCCCUUCAGUCCAACCA	.	AGCUGCUGAUUCAUGCAUUCU	.	UGUGCAUGACGCAGGAGAUG	.	UUGGAUUGAAGGGAGCUCCA	MEME	Nested
pta-MIR159b	GAGCUUUCUUCAGUCCAACGA	.	AACUGCUGGUUCAUGGACUCU	.	UGUGCAUGACACGGGAGUCG	.	UUGGAUUGAAGAGAGCUCCC	MEME	Nested
pta-MIR159c	GAGCUGAUUUUGUCCAGGA	.	.	.	.	.	CUUGGAUUGAAGGGAGCUCCC	.	Non-nested
ptc-MIR159a	GAGCUCCUUGAAGUCCAAUAGA	.	AGCUGCUAAGCUAUGGAUCC	.	CUUGCAUAUCUCAGGAGCUUU	.	UUUGGAUUGAAGGGAGCUCUA	blastn	Nested
ptc-MIR159b	GAGCUCCUUGAAGUCCAAUAG	.	AGCUGCUGAGCUAUGAAUCCC	.	CUUGCAUAUCUCAGGAGCUUU	.	UUUGGAUUGAAGGGAGCUCUA	blastn	Nested
ptc-MIR159c	GAGCUCUCCCCACUCCAUGCC	.	GGCUGCUAGUUCAUGAAUACC	.	UCUGCAUGACCUAGGAGACG	.	AUUGGAGUGAAGGGAGCUCGA	MEME	Nested
ptc-MIR159d	GAGCUUUCUUUGGUUCAAAAU	.	GUCUGCUUGUUCAUGGAUACC	.	UUUGCAUGGCCAAGGAGACGU	.	CUUGGAUUGAAGGGAGCUCCU	blastn	Nested
ptc-MIR159e	GAGCUUGCUCACUCCAGAU	.	UUCUGCUACUUCAUGAAUACC	.	UCUGCAUGUGCUAGGAGAUG	.	CUUGGGGUGAAGGGAGCUCCU	MEME	Nested
pvu-MIR159a	GAGCUCCUUGAAGUCCAAUUG	.	AGCUGCUUAGCUAUGGAUCCC	.	CUUCCAUAUCUGGGGAGCUUC	.	UUUGGAUUGAAGGGAGCUCUA	blastn	Nested
rco-MIR159	GAGCUCCUUGAAGUCCAAUAG	.	AGCUGCUGAGCUAUGGAUCCC	.	CUUGCAUAUCUCAGGAGCUUC	.	UUUGGAUUGAAGGGAGCUCUA	blastn	Nested
sbi-MIR159a	AAGCUCCUAUCAUUCCAAUGA	.	CGCUGCUCGUUCAUGGUUCCC	.	UUUGCAUGACCGAGGAGCUGC	.	UUUGGAUUGAAGGGAGCUCUG	blastn	Nested
sbi-MIR159b	GAGCUCCCUUCGAUCCAAUCC	.	AGCUGCCGGUUCAUGGAUGCC	.	UGUGCAUGACCCGGGAGAUG	.	CUUGGAUUGAAGGGAGCUCCU	MEME	Nested
sly-MIR159	GAGCUCCUUGAAGUCCAACAA	.	AGCUGCUGACCUAUGGAUUCC	.	UUUGCAUAUGUCAGGAGCUUU	.	UUUGGAUUGAAGGGAGCUCUA	blastn	Nested
smo-MIR159	GAGCUCCCUUCAAUUCAACUG	.	CGCUGCUGACUCAUGCAUUCG	.	UGUGCAUGAUGCAGGAGCAG	.	CUUGGAUUGAAGGGAGCUCCC	MEME	Nested
sof-MIR159a	GAGCUCCUAUCAUUCCAAUGA	.	CGCUGCUCGUUCAUGGUUCCC	.	UUUGCAUGACCGAGGAGCUGC	.	UUUGGAUUGAAGGGAGCUCUG	blastn	Nested
sof-MIR159b	GAGCUCCUAUCAUUCCAAUGA	.	CGCUGCUCGUUCAUGGUUCCC	.	UUUGCAUGACCGAGGAGCUGC	.	UUUGGAUUGAAGGGAGCUCUG	blastn	Nested
sof-MIR159c	GAGCUCCCUUCGAUCCAAUCC	.	AGCUGCCGGUUCAUGGAUGCC	.	UGUGCAUGACCCGGGAGAUG	.	CUUGGAUUGAAGGGAGCUCCU	MEME	Nested
sof-MIR159d	GAGCUCCUAUCAUUCCAAUGA	.	CGCUGCUCGUUCAUGGUUCCC	.	UUUGCAUGACCGAUGAGCUG	.	UUUGGAUUGAAGGGAGCUCUG	MEME	Nested
sof-MIR159e	GAGCUCCUAUCAUUCCAAUGA	.	CGCUGCUCGUUCAUGGUUCCC	.	UUUGCAUGACCGAAGAGCUGC	.	UUUGGAUUGAAAGGAGCUCUU	blastn	Nested
ssp-MIR159a	GAGCUCCUAUCAUUCCAAUGA	.	CGCUGCUCGUUCAUGGUUCCC	.	UUUGCAUGACCGAGGAGCUGC	.	UUUGGAUUGAAGGGAGCUCUG	blastn	Nested
tae-MIR159a	GAGCUCCUAUCAUUCCAAUGA	.	AGCUGCUCGUUCAUGGUUCCC	.	UUUGCAUGACCGAGGAGCCGC	.	UUUGGAUUGAAGGGAGCUCUG	blastn	Nested
tae-MIR159b	GAGCUCCUUUCGGUCCAAAAAGG	.	AGCUGCUGGGUCAUGGAUCCC	.	CUUGCAUGCCCCAGGAGCUGC	.	UUUGGAUUGAAGGGAGCUCUG	blastn	Nested
vvi-MIR159a	GAGCUCCUUUACGCUCCAGUUC	.	AGCUGCUGGUUCAUGAGUACC	.	UGUGCAUGACCUCGGAGAAG	.	CUUGGAGUGAAGGGAGCUCUC	MEME	Nested
vvi-MIR159b	GAGCUUCUUUACACUCCAGAA	.	UACUGCUGGUUCAUGAAAACC	.	UUUGCAUGAACUUGGAGAAG	.	CUUGGAGUGAAGGGAGCUCUC	MEME	Nested
vvi-MIR159c	GAGCUCCUUGAAGUCCAAUAG	.	AGCUGCUGACUUAUGGAUCCC	.	CUUGCAUAUCUCAGGAGCUGC	.	UUUGGAUUGAAGGGAGCUCUA	blastn	Nested
zma-MIR159a	GAGCUCCUAUCAUUCCAAUGA	.	CGCUGCUCGUUCAUGGUUCCC	.	UUUGCAUGACCGAGGAGCUGC	.	UUUGGAUUGAAGGGAGCUCUG	blastn	Nested
zma-MIR159b	GUGCUCCCUUCAAACCAAUAA	.	AGCUGCUCGUUCAUGGUUCCC	.	UUUGCAUGACCGAGGAGCUGC	.	UUUGGAUUGAAGGGAGCUCUG	blastn	Nested
zma-MIR159c	GAGCUCCCUUCGAUCCAAUCC	.	AGCUGCCGGUUCAUGGAUACC	.	UGUGCAUGACCCGGGAGAUG	.	CUUGGAUUGAAGGGAGCUCCU	MEME	Nested
zma-MIR159d	GAGCUCCCUUCGAUCCAAUCC	.	AGCUGCCGGUUCAUGGAUACC	.	UGUGCAUGACCCGGGAGACG	.	CUUGGAUUGAAGGGAGCUCCU	MEME	Nested
zma-MIR159f	GAGCUCCUCUCAUUCCAAUGA	.	CGCUGCUCGUUCAUGGUUCCC	.	UUUGCAUGACCGAGGAGCUGC	.	UUUGGAUUGAAGGGAGCUCUG	blastn	Nested
zma-MIR159g	GUGCUCCCUUCACACCAAUAA	.	AGCUGCUCGUUCAUGGUUCCC	.	UUUGCAUGACCGAGGAGCUGC	.	UUUGGAGUGAAGGGAGUUCUG	blastn	Nested
zma-MIR159h	GUGCUCCCUUCACACCAAUAA	.	AGCUGCUCGUUCAUGGUUCCC	.	UUUGCAUGACCGAGGAGCUGC	.	UUUGGAGUGAAGGGAGCUCUG	blastn	Nested
zma-MIR159i	GUGCUCCCUUCACACCAAUAA	.	AGCUGCUCGUUCAUGGUUCCC	.	UUUGCAUGACCGAGGAGCUGC	.	UUUGGAGUGAAGGGAGCUCUG	blastn	Nested
zma-MIR159j	GUGCUCCCUUCAAACCAAUAA	.	AGCUGCUCGUUCAUGGUUCCC	.	UUUGCAUGACCGAGGAGCUGC	.	UUUGGAUUGAAGGGAGCUCUG	blastn	Nested
zma-MIR159k	GUGCUCCCUUCAAACCAAUAA	.	AACUGCUCGUUCAUGGUUCCC	.	UUUGCAUGACCGAGGAGCUGC	.	UUUGGAUUGAAGGGAGCUCUG	blastn	Nested
Yellow: mature miRNAs annotated in miRBase version 21 and its star based on secondary structure.
Green: sibling miRNAs got by blastn search or MEME motif discovery.

## Sheet: S_3
Table S3. Nested structure miRNAs in Arabidopsis thaliana.
name	chr	type	start	end	strand	original
ath-MIR447a	chr4	miRNA_primary_transcript	1528134	1528370	-	miRBase V21
ath-miR447a.2-3p	chr4	miRNA	1528148	1528168	-	miRBase V21
ath-miR447a-3p	chr4	miRNA	1528190	1528211	-	miRBase V21
ath-MIR779	chr2	miRNA_primary_transcript	9560761	9560923	+	miRBase V21
ath-miR779.1	chr2	miRNA	9560902	9560922	+	miRBase V21
ath-miR779.2	chr2	miRNA	9560866	9560886	+	miRBase V21
ath-MIR780	chr4	miRNA_primary_transcript	8504141	8504314	-	miRBase V21
ath-miR780.1	chr4	miRNA	8504166	8504186	-	miRBase V21
ath-miR780.2	chr4	miRNA	8504145	8504165	-	miRBase V21
ath-MIR829	chr1	miRNA_primary_transcript	11834022	11834226	-	miRBase V21
ath-miR829-3p.1	chr1	miRNA	11834094	11834117	-	miRBase V21
ath-miR829-3p.2	chr1	miRNA	11834073	11834093	-	miRBase V21
ath-miR829-5p	chr1	miRNA	11834153	11834173	-	miRBase V21
ath-MIR159a	chr1	miRNA_primary_transcript	27713233	27713416	-	Zhang et al. Genome Biology 2010, 11:R81
ath-miR159a.1(ath-miR159a)	chr1	miRNA	27713234	27713254	-	Zhang et al. Genome Biology 2010, 11:R81
ath-miR159a.2-3p	chr1	miRNA	27713284	27713304	-	Zhang et al. Genome Biology 2010, 11:R81
ath-miR159a.3	chr1	miRNA	27713305	27713327	-	Zhang et al. Genome Biology 2010, 11:R81
ath-miR159a.2-5p	chr1	miRNA	27713350	27713370	-	Zhang et al. Genome Biology 2010, 11:R81
ath-miR159a.1*	chr1	miRNA	27713393	27713413	-	Zhang et al. Genome Biology 2010, 11:R81
ath-MIR159b	chr1	miRNA_primary_transcript	6220646	6220841	+	Zhang et al. Genome Biology 2010, 11:R81
ath-miR159b.1(ath-miR159b)	chr1	miRNA	6220813	6220833	+	Zhang et al. Genome Biology 2010, 11:R81
ath-miR159b.1*	chr1	miRNA	6220650	6220670	+	Zhang et al. Genome Biology 2010, 11:R81
ath-miR159b.2-5p(ath-M2670L)	chr1	miRNA	6220694	6220714	+	Zhang et al. Genome Biology 2010, 11:R81
ath-miR159b.2-3p	chr1	miRNA	6220762	6220782	+	Zhang et al. Genome Biology 2010, 11:R81

## Sheet: S_4
Table S4. ath-MIR159a_5'_upstream_promoter_motif
Factor or site name	Loc.	strand	Signal sequence
CGACGOSAMY3	1560	(+)	CGACG
ACGTCBOX	1561	(+)	GACGTC
ACGTATERD1	1562	(+)	ACGT
TAAAGSTKST1	1570	(+)	TAAAG
DOFCOREZM	1571	(+)	AAAG
TATABOX2	1578	(+)	TATAAAT
DOFCOREZM	1587	(+)	AAAG
CACTFTPPCA1	1607	(+)	YACT
RAV1AAT	1611	(+)	CAACA
WBOXATNPR1	1616	(+)	TTGAC
WBOXHVISO1	1617	(+)	TGACT
WBOXNTERF3	1617	(+)	TGACY
WRKY71OS	1617	(+)	TGAC
CAATBOX1	1625	(+)	CAAT
-10PEHVPSBD	1629	(+)	TATTCT
GT1CORE	1660	(+)	GGTTAA
ANAERO1CONSENSUS	1664	(+)	AAACAAA
DOFCOREZM	1669	(+)	AAAG
NODCON1GM	1669	(+)	AAAGAT
OSE1ROOTNODULE	1669	(+)	AAAGAT
ARR1AT	1674	(+)	NGATT
GTGANTG10	1679	(+)	GTGA
ROOTMOTIFTAPOX1	1683	(+)	ATATT
ROOTMOTIFTAPOX1	1709	(+)	ATATT
CACTFTPPCA1	1731	(+)	YACT
POLLEN1LELAT52	1736	(+)	AGAAA
POLASIG2	1739	(+)	AATTAAA
RBCSCONSENSUS	1751	(+)	AATCCAA
POLLEN1LELAT52	1757	(+)	AGAAA
GT1CONSENSUS	1758	(+)	GRWAAW
POLASIG1	1761	(+)	AATAAA
DOFCOREZM	1766	(+)	AAAG
RAV1AAT	1776	(+)	CAACA
ROOTMOTIFTAPOX1	1803	(+)	ATATT
CACTFTPPCA1	1831	(+)	YACT
ARR1AT	1838	(+)	NGATT
CARGNCAT	1874	(+)	CCWWWWWWWWGG
CARGCW8GAT	1875	(+)	CWWWWWWWWG
UP1ATMSD	1884	(+)	GGCCCAWWW
EBOXBNNAPA	1918	(+)	CANNTG
MYB2CONSENSUSAT	1918	(+)	YAACKG
MYCCONSENSUSAT	1918	(+)	CANNTG
MYBCORE	1921	(+)	CNGTTR
SITEIIATCYTC	1932	(+)	TGGGCY
SORLIP2AT	1933	(+)	GGGCC
UP1ATMSD	1934	(+)	GGCCCAWWW
SITEIIATCYTC	1945	(+)	TGGGCY
POLLEN1LELAT52	1955	(+)	AGAAA
DOFCOREZM	1957	(+)	AAAG
CCAATBOX1	1970	(+)	CCAAT
CAATBOX1	1971	(+)	CAAT
TAAAGSTKST1	1978	(+)	TAAAG
DOFCOREZM	1979	(+)	AAAG
POLASIG3	1991	(+)	AATAAT
CACTFTPPCA1	2011	(+)	YACT
GTGANTG10	2024	(+)	GTGA
WBOXNTERF3	2025	(+)	TGACY
WRKY71OS	2025	(+)	TGAC
DOFCOREZM	2030	(+)	AAAG
POLLEN1LELAT52	2032	(+)	AGAAA
ANAERO1CONSENSUS	2035	(+)	AAACAAA
DOFCOREZM	2039	(+)	AAAG
EBOXBNNAPA	2052	(+)	CANNTG
MYCCONSENSUSAT	2052	(+)	CANNTG
POLLEN1LELAT52	2068	(+)	AGAAA
GT1CONSENSUS	2069	(+)	GRWAAW
GT1GMSCAM4	2069	(+)	GAAAAA
MYBST1	2079	(+)	GGATA
GATABOX	2080	(+)	GATA
CACTFTPPCA1	2082	(+)	YACT
GTGANTG10	2107	(+)	GTGA
SEF4MOTIFGM7S	2129	(+)	RTTTTTR
TATABOX5	2133	(+)	TTATTT
TATABOXOSPAL	2134	(+)	TATTTAA
CAREOSREP1	2142	(+)	CAACTC
MYBST1	2167	(+)	GGATA
GATABOX	2168	(+)	GATA
GT1CONSENSUS	2168	(+)	GRWAAW
IBOXCORE	2168	(+)	GATAA
CACTFTPPCA1	2180	(+)	YACT
GTGANTG10	2204	(+)	GTGA
DOFCOREZM	2207	(+)	AAAG
SURECOREATSULTR11	2210	(+)	GAGAC
SURECOREATSULTR11	2215	(+)	GAGAC
GTGANTG10	2222	(+)	GTGA
GT1CONSENSUS	2227	(+)	GRWAAW
POLASIG1	2249	(+)	AATAAA
CAATBOX1	2260	(+)	CAAT
ARR1AT	2264	(+)	NGATT
POLLEN1LELAT52	2281	(+)	AGAAA
POLASIG3	2284	(+)	AATAAT
WBOXNTCHN48	2327	(+)	CTGACY
WBOXNTERF3	2328	(+)	TGACY
WRKY71OS	2328	(+)	TGAC
CURECORECR	2333	(+)	GTAC
CACTFTPPCA1	2349	(+)	YACT
AMYBOX1	2384	(+)	TAACARA
GAREAT	2384	(+)	TAACAAR
MYBGAHV	2384	(+)	TAACAAA
EBOXBNNAPA	2387	(+)	CANNTG
MYCCONSENSUSAT	2387	(+)	CANNTG
ARR1AT	2391	(+)	NGATT
QELEMENTZMZM13	2403	(+)	AGGTCA
MYBPLANT	2407	(+)	MACCWAMC
MYBCOREATCYCB1	2412	(+)	AACGG
DPBFCOREDCDC3	2419	(+)	ACACNNG
CACTFTPPCA1	2420	(+)	YACT
EBOXBNNAPA	2420	(+)	CANNTG
MYCCONSENSUSAT	2420	(+)	CANNTG
CURECORECR	2425	(+)	GTAC
TATABOX5	2430	(+)	TTATTT
DOFCOREZM	2440	(+)	AAAG
POLLEN1LELAT52	2442	(+)	AGAAA
POLASIG1	2445	(+)	AATAAA
TAAAGSTKST1	2447	(+)	TAAAG
DOFCOREZM	2448	(+)	AAAG
INRNTPSADB	2466	(+)	YTCANTYY
DOFCOREZM	2475	(+)	AAAG
CARGCW8GAT	2485	(+)	CWWWWWWWWG
GATABOX	2520	(+)	GATA
GT1CONSENSUS	2520	(+)	GRWAAW
IBOXCORE	2520	(+)	GATAA
POLASIG3	2523	(+)	AATAAT
TATABOX5	2531	(+)	TTATTT
SEF4MOTIFGM7S	2533	(+)	RTTTTTR
DOFCOREZM	2560	(+)	AAAG
GTGANTG10	2565	(+)	GTGA
DOFCOREZM	2575	(+)	AAAG
EBOXBNNAPA	2591	(+)	CANNTG
MYCATERD1	2591	(+)	CATGTG
MYCCONSENSUSAT	2591	(+)	CANNTG
GTGANTG10	2594	(+)	GTGA
ASF1MOTIFCAMV	2595	(+)	TGACG
WRKY71OS	2595	(+)	TGAC
CGCGBOXAT	2597	(+)	VCGCGB
CANBNNAPA	2610	(+)	CNAACAC
CAATBOX1	2620	(+)	CAAT
BIHD1OS	2623	(+)	TGTCA
EBOXBNNAPA	2647	(+)	CANNTG
MYCCONSENSUSAT	2647	(+)	CANNTG
EBOXBNNAPA	2657	(+)	CANNTG
MYCCONSENSUSAT	2657	(+)	CANNTG
RAV1BAT	2657	(+)	CACCTG
PYRIMIDINEBOXOSRAMY1A	2665	(+)	CCTTTT
-10PEHVPSBD	2684	(+)	TATTCT
RHERPATEXPA7	2694	(+)	KCACGW
MYB1AT	2706	(+)	WAACCA
CACTFTPPCA1	2710	(+)	YACT
ASF1MOTIFCAMV	2752	(+)	TGACG
AUXRETGA2GMGH3	2752	(+)	TGACGTGGC
HEXAT	2752	(+)	TGACGTGG
TGACGTVMAMY	2752	(+)	TGACGT
WRKY71OS	2752	(+)	TGAC
ABRELATERD1	2754	(+)	ACGTG
ABREOSRAB21	2754	(+)	ACGTSSSC
ACGTABREMOTIFA2OSEM	2754	(+)	ACGTGKC
ACGTATERD1	2754	(+)	ACGT
BOXIIPCCHS	2754	(+)	ACGTGGC
NODCON2GM	2761	(+)	CTCTT
OSE2ROOTNODULE	2761	(+)	CTCTT
CTRMCAMV35S	2765	(+)	TCTCTCTCT
CTRMCAMV35S	2767	(+)	TCTCTCTCT
CTRMCAMV35S	2769	(+)	TCTCTCTCT
NODCON2GM	2774	(+)	CTCTT
OSE2ROOTNODULE	2774	(+)	CTCTT
GT1CORE	2802	(+)	GGTTAA
HDZIP2ATATHB2	2805	(+)	TAATMATTA
POLASIG3	2806	(+)	AATAAT
NODCON2GM	2825	(+)	CTCTT
OSE2ROOTNODULE	2825	(+)	CTCTT
ARR1AT	2870	(+)	NGATT
EECCRCAH1	2871	(+)	GANTTNC
NODCON2GM	2878	(+)	CTCTT
OSE2ROOTNODULE	2878	(+)	CTCTT
SEF4MOTIFGM7S	2888	(+)	RTTTTTR
ACGTATERD1	2902	(+)	ACGT
TAAAGSTKST1	2941	(+)	TAAAG
DOFCOREZM	2942	(+)	AAAG
BIHD1OS	2964	(+)	TGTCA
ROOTMOTIFTAPOX1	2979	(+)	ATATT
WBOXATNPR1	2983	(+)	TTGAC
WRKY71OS	2984	(+)	TGAC
GATABOX	2990	(+)	GATA
CACTFTPPCA1	2992	(+)	YACT
TBOXATGAPB	2993	(+)	ACTTTG
GATABOX	3005	(+)	GATA
ASF1MOTIFCAMV	3019	(+)	TGACG
WRKY71OS	3019	(+)	TGAC
CACTFTPPCA1	2992	(+)	YACT
TBOXATGAPB	2993	(+)	ACTTTG
GATABOX	3005	(+)	GATA
ASF1MOTIFCAMV	3019	(+)	TGACG
WRKY71OS	3019	(+)	TGAC
